# Supplementary material for: 310 nm UV-LEDs attenuate imiquimod-induced psoriasis-like skin lesions in C57BL/6 mice and inhibit IL-22-induced STAT3 expression in HaCaTcells
Source: Royal Society of Chemistry journal article supplement (doi:10.1039/c9pp00444k), 2020-04-14

## Supplementary figures

**A.** Cell viability of HaCaT cells with IL-22 treatment (12.5, 25, 50 , 100 ng/mL).  
This test was performed at 24 h.

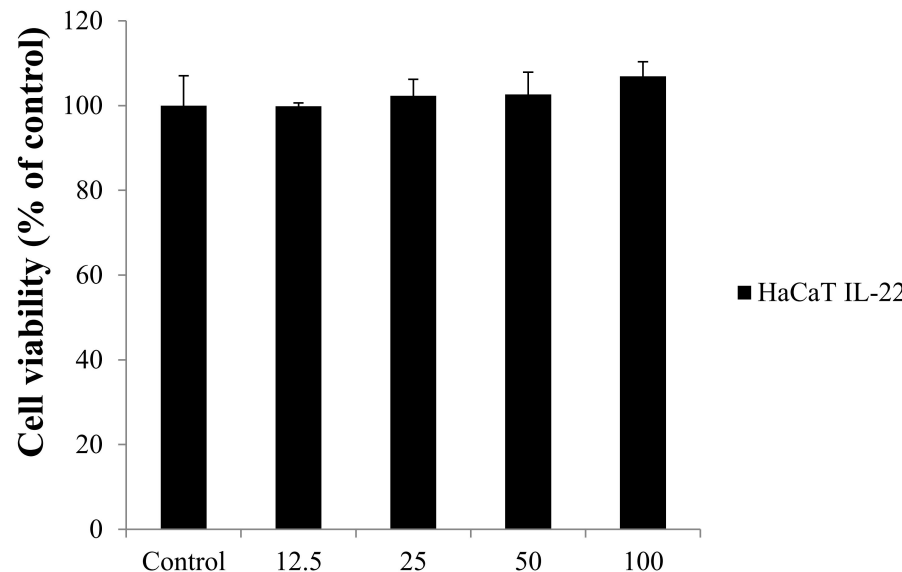

Supplement: c9pp00444k1.pdf [file c9pp00444k1.pdf]
