# Supplementary material for: 310 nm UV-LEDs attenuate imiquimod-induced psoriasis-like skin lesions in C57BL/6 mice and inhibit IL-22-induced STAT3 expression in HaCaTcells
Source: Royal Society of Chemistry journal article supplement (doi:10.1039/c9pp00444k), 2020-04-14

**B.** UV-LEDs cytotoxicity to HaCaT cells was measured by CCK-8 assays. Cells in 96-well microplates ( $2 \times 10^4$  cells/well) were irradiated with 310 nm UV-LED and 311 nm NBUVB (30, 40, 50, and 60 mJ/cm<sup>2</sup>) for 72 h (blue bars).

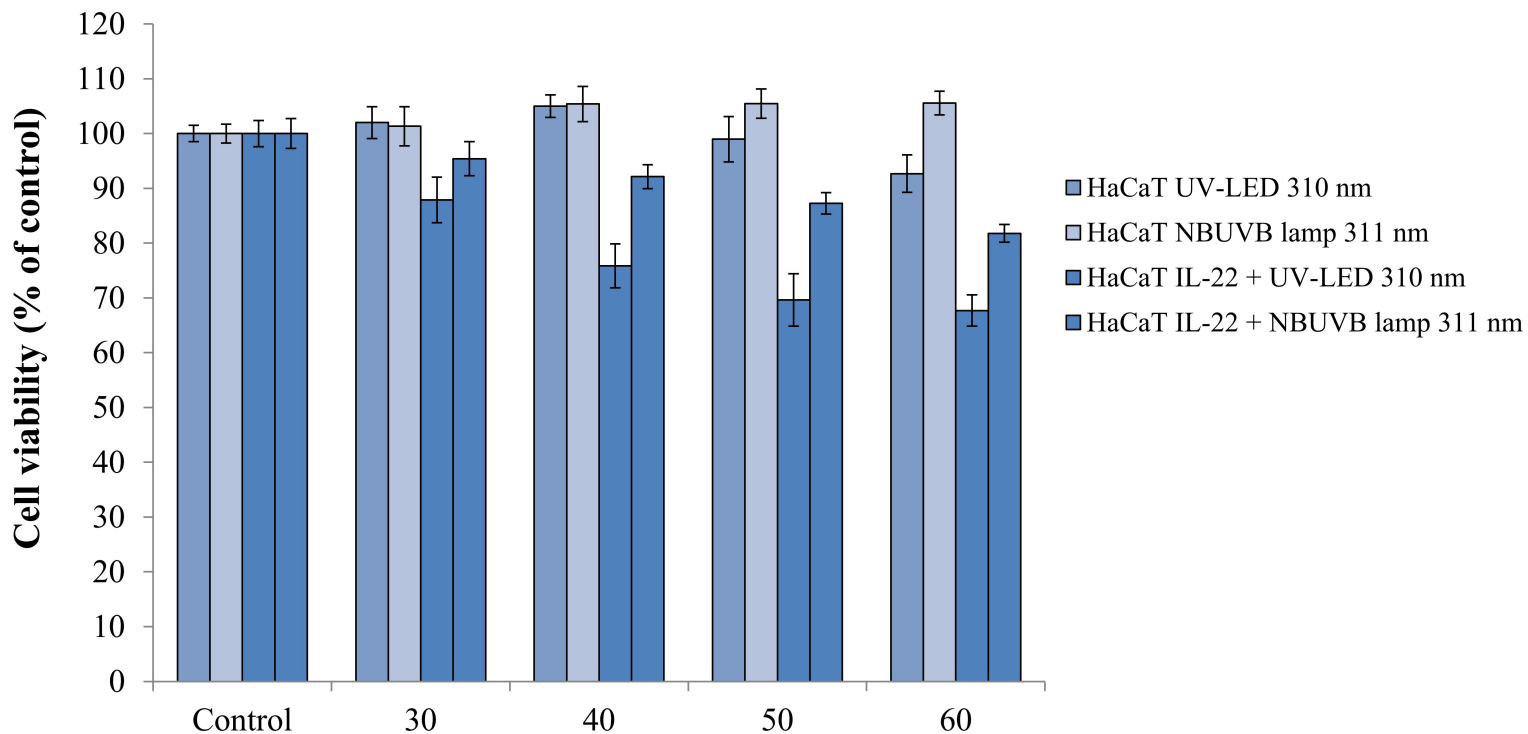

Supplement: c9pp00444k2.pdf [file c9pp00444k2.pdf]
